# Supplementary material
Source: PubMed Central journal article supplement (PMC3022020)
Supplement: NIHMS247715-supplement-1_si_001.pdf [file NIHMS247715-supplement-1_si_001.pdf]

## **Support information**

### **On-Plate Desalting and SALDI-MS Analysis of Peptides on Hydrophobic Silicate Nanofilms on a Gold Substrate**

Jicheng Duan, Hui Wang and Quan Cheng<sup>\*</sup>

Department of Chemistry, University of California, Riverside, California 92521, USA

<sup>\*</sup>Corresponding author: Quan Cheng,

Tel: (951) 827-2702      Email: [quan.cheng@ucr.edu](mailto:quan.cheng@ucr.edu)

Fax: (951) 827-4713

---

**Table S1. SPR angle for different substrates <sup>a</sup>**

---

| Surface      | SPR angle  | Angle shift | Standard Deviation |
|--------------|------------|-------------|--------------------|
| Blank Au     | 62.21±0.01 | -           | -                  |
| 8Layer-flat  | 62.40±0.06 | 0.19        | 32%                |
| 4Layer-rough | 63.00±0.12 | 0.79        | 15%                |
| 8Layer-rough | 64.12±0.26 | 1.91        | 14%                |

<sup>a</sup> n = 5. Films on BK-7 glass.

---

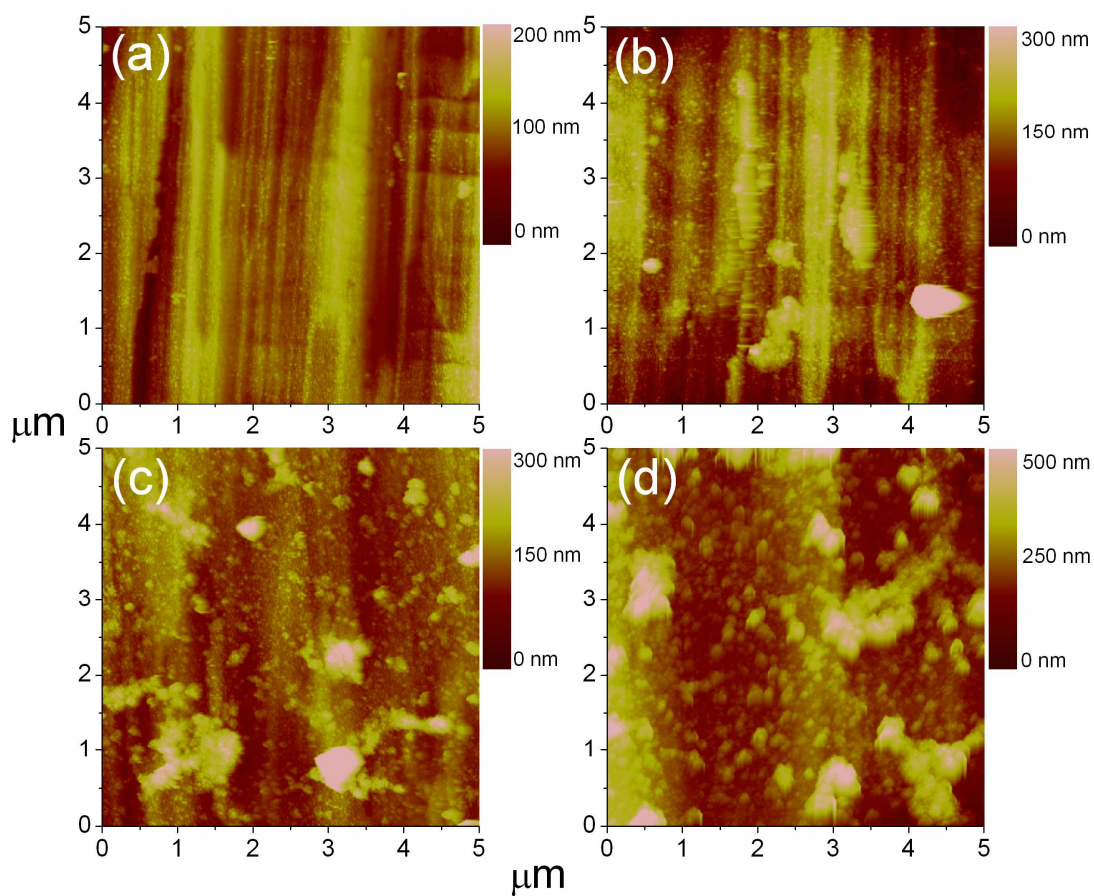

**Figure S1.** AFM images for calcinated substrates. (a) Au-covered steel substrate; (b) 8 layers of silicate fabricated with water washing between deposition of each polyelectrolytes; (c) 4 layers of silicate fabricated without water washing; (d) 8 layers of silicate fabricated without water washing. Bright streaks were observed across the images, corresponding to ridges and wrinkles on the SST substrate.

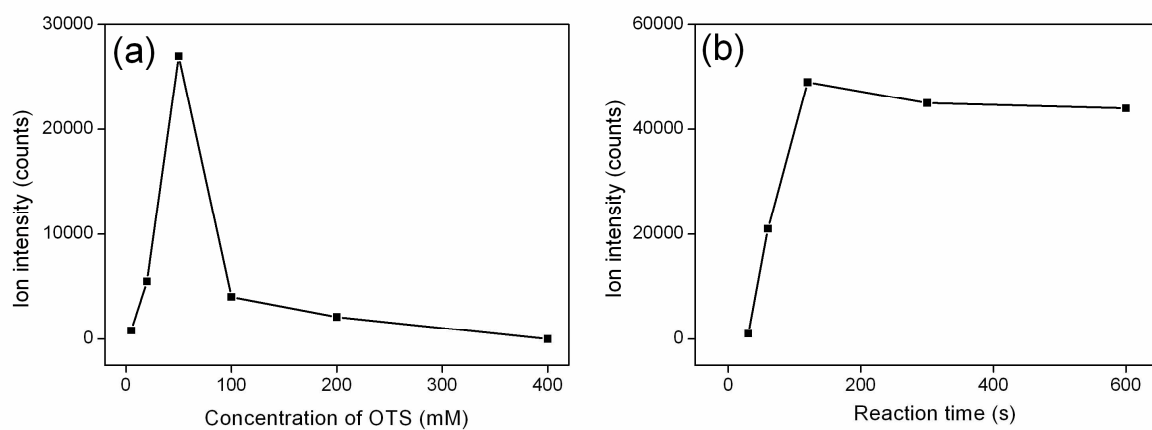

**Figure S2.** Effect of OTS modification on LDI performance of calcinated substrate. (a) Effect of OTS concentration, reaction time was 30 s; (b) effect of reaction time, OTS concentration was 10 mM. The analyte was 20 pmol of [Sar1, Thr8]-angiotensin II.

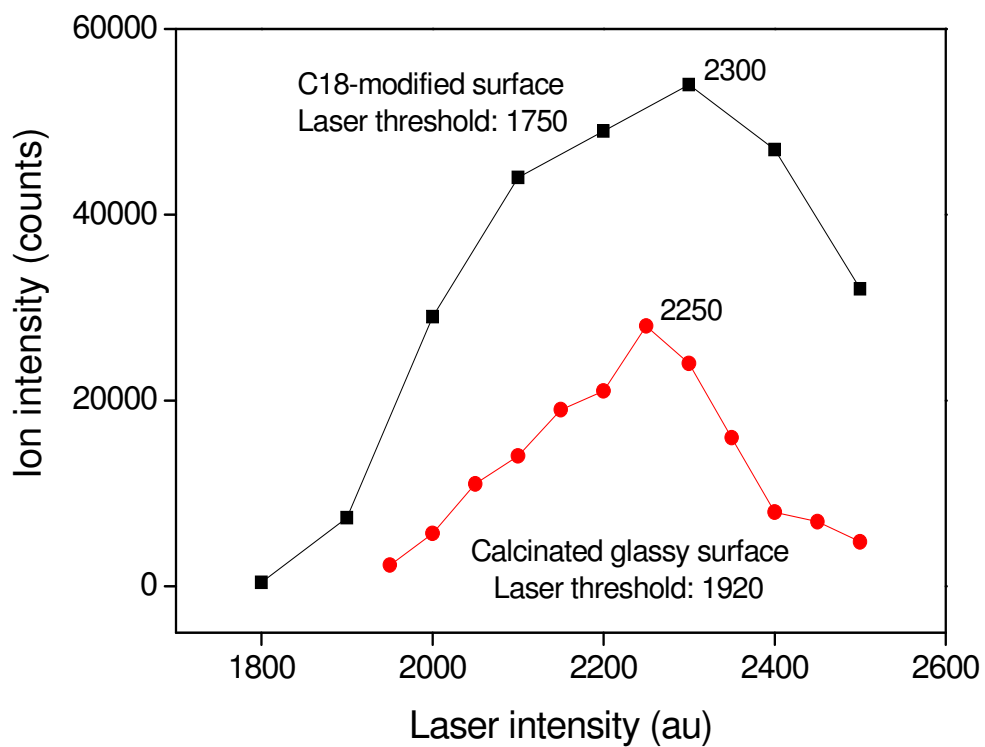

**Figure S3.** Dependency of signal-to-noise ratio for peptide protonated ions on laser intensity in SALDI-MS detection with C18-modified (square) and unmodified (circle) glassy substrates. Substrates were covered by 5 layers of silicate. The analyte was 20 pmol of [Sar1, Thr8]-angiotensin II. Error bars are omitted for simplicity.

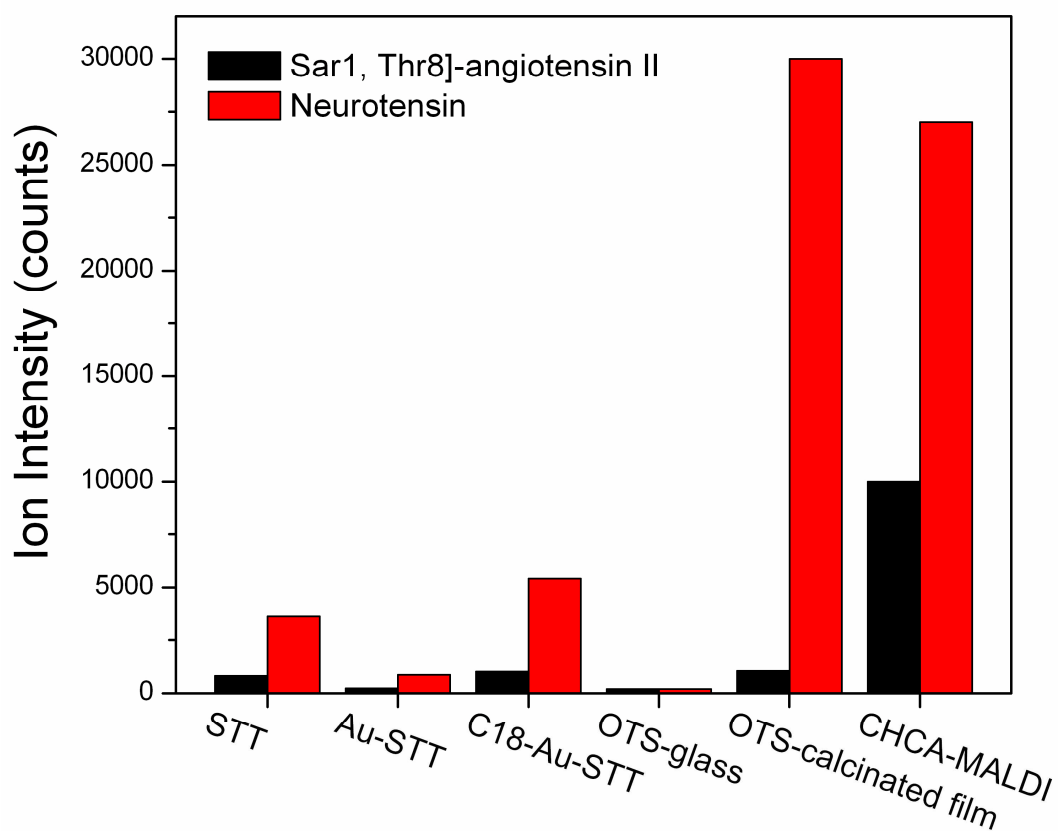

**Figure S4.** Comparison of SALDI performance with different substrates. STT: stainless steel tape; Au-STT: gold-coated stainless steel tape; C18-Au-STT: gold-coated steel substrate treated with 1-octadecanethiol; OTS-glass: OTS modified glass substrate; OTS-calcinated film: OTS-modified calcinated substrate (8-layer smooth surface); CHCA-MALDI: MALDI with CHCA matrix. The analyte was mixture of [Sar1, Thr8]-angiotensin II and neurotensin, 20 pmol each.

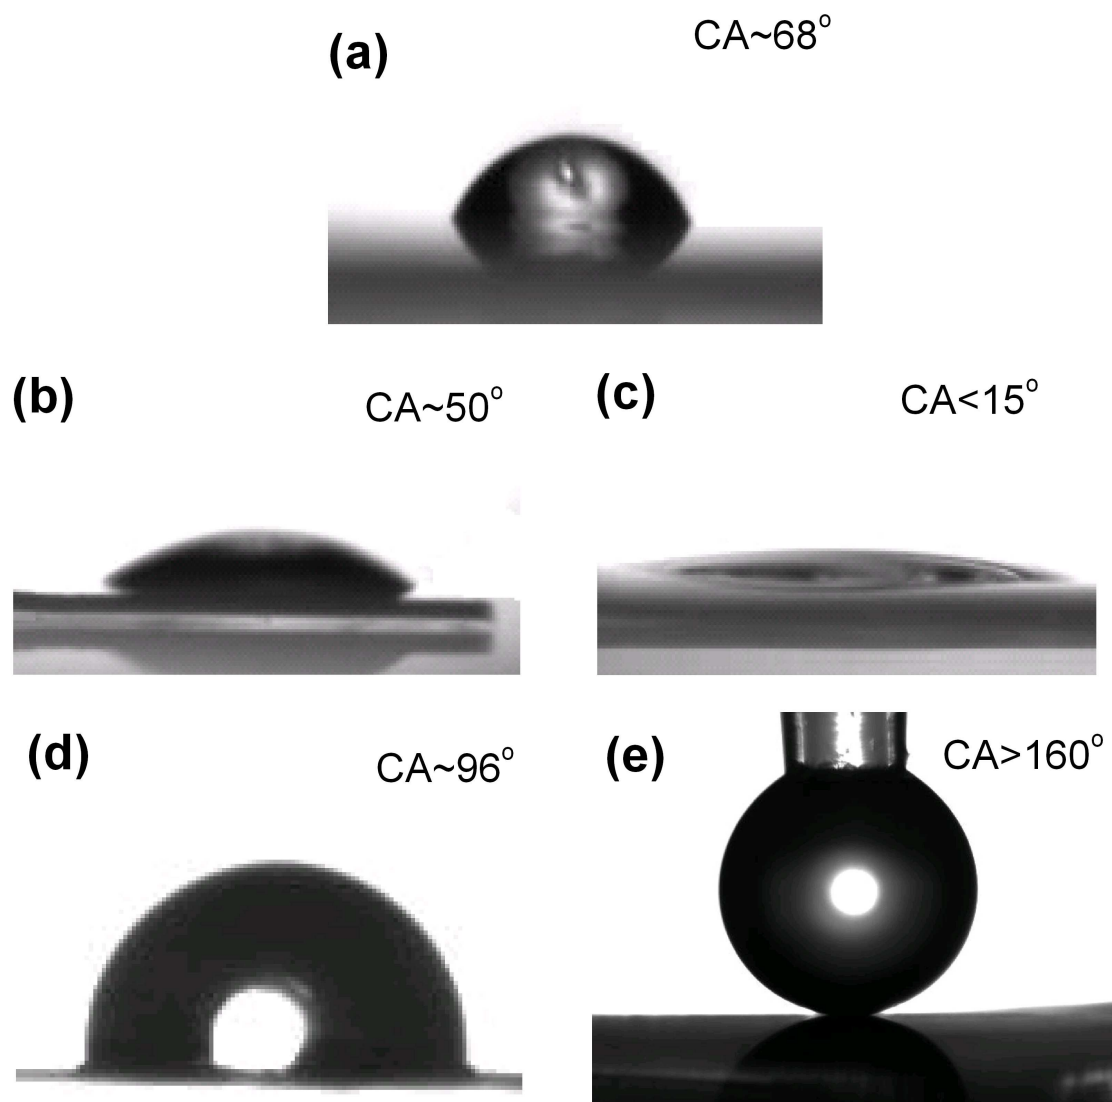

**Figure S5.** Contact angle measurement on different substrates. (a) Bare gold substrate; (b) substrate coated with 8-layer S-film (with washing); (c) substrate coated with 8-layer R-film (without washing); (d) substrate coated with 8-layer S-film after OTS modification; (e) substrate coated with 8-layer R-film after OTS modification. CA: contact angle.

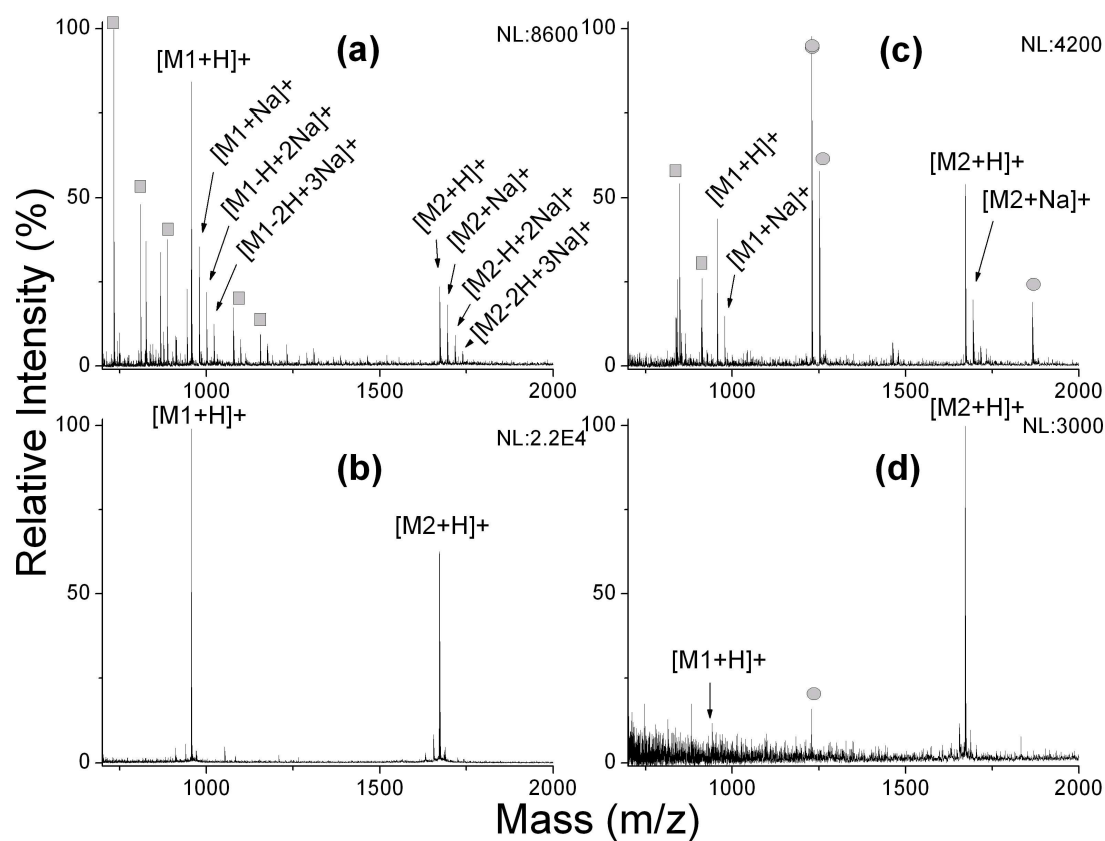

**Figure S6.** MALDI and SALDI mass spectra of peptide mixtures in the presence of detergents. (a) 0.2% SDS, CHCA matrix; (b) 0.2% SDS, OPD/SALDI on an OTS-modified calcinated surface; (c) 0.1% CHAPs, CHCA matrix; (d) 0.1% CHAPs, OPD/SALDI on an OTS-modified calcinated surface. The analyte was the mixture of [Sar1, Thr8]-angiotensin II (M1) and neurotensin (M2), 2 pmol each. Squares ( $\square$ ) represent peaks from CHCA related ions; Circles ( $\circ$ ) represent peaks from detergents. NL: normalized level.



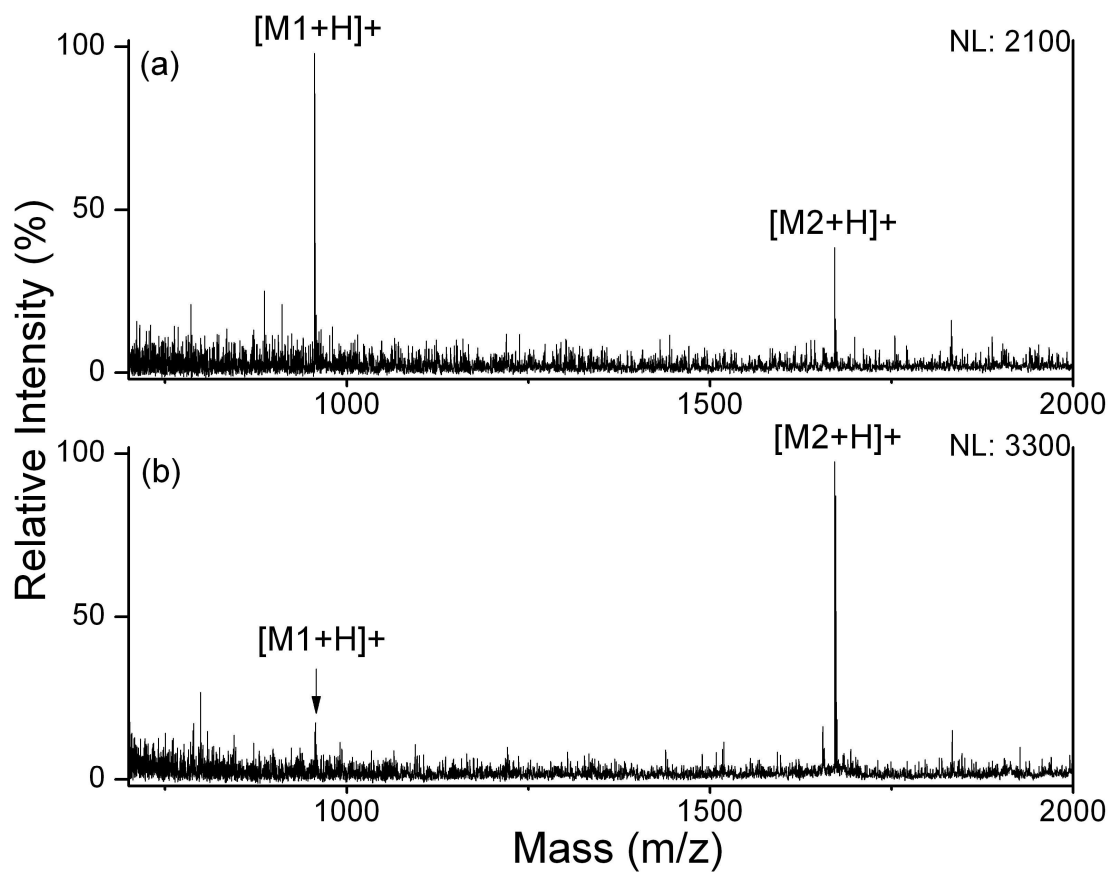

**Figure S7.** SALDI-MS analysis of peptides treated by different desalting methods: (a) off-probe desalting with ZipTip-C18 pipette tip; (b) on-plate desalting with OTS-modified 8-layer R-film. The analyte was the mixture of [Sar1, Thr8]-angiotensin II (M1) and neurotensin (M2) in 200 mM NaAc, 100 fmol each.

**Table S2. Detected peptides in 40fmol cytochrome c digest in the presence of 50 mM NH<sub>4</sub>HCO<sub>3</sub>**

| Peaks | Calculated m/z | Sequence              | Position | pI <sup>a</sup> | GRAVY <sup>a</sup> | MALDI-MS | SALDI-MS |
|-------|----------------|-----------------------|----------|-----------------|--------------------|----------|----------|
| CT1   | 779.448        | MIFAGIK               | 81-87    | 8.50            | 1.600              | *        | *        |
| CT 2  | 790.405        | TDANKNK               | 50-56    | 8.26            | -2.457             |          | *        |
| CT 3  | 955.500        | TGPNLHGLF             | 29-37    | 6.40            | 0.067              | *        | *        |
| CT 4  | 1065.521       | GEREDLIAY             | 90-98    | 4.14            | -0.733             |          | *        |
| CT 5  | 1193.616       | KGEREDLIAY            | 89-98    | 4.68            | -1.050             | *        | *        |
| CT 6  | 1220.653       | HKTGPNLHGLF           | 27-37    | 8.76            | -0.591             | *        | *        |
| CT 7  | 1321.711       | KKGEREDLIAY           | 88-98    | 6.18            | -1.309             | *        | *        |
| CT 8  | 1456.670       | TGQAPGFSYTDANK        | 41-54    | 5.50            | -0.993             | *        |          |
| CT 9  | 1584.765       | KTGQAPGFSYTDANK       | 40-54    | 8.50            | -1.187             | *        |          |
| CT 10 | 1633.819       | IFVQKCAQCHTVEK        | 10-23    | 8.06            | 0.021              | *        | *        |
| CT 11 | 1880.858       | VQKCAQCHTVEKGGKHK     | 12-28    | 9.31            | -1.106             | *        |          |
| CT 12 | 2060.223       | AGIKKKGEREDLIAYLKK    | 84-101   | 9.70            | -0.911             |          | *        |
| CT 13 | 2138.047       | GITWGEETLMEYLENPKK    | 57-74    | 4.49            | -0.961             | *        |          |
|       |                | Matched Peptides      |          |                 |                    | 10       | 9        |
|       |                | Sequence Coverage (%) |          |                 |                    | 77.1     | 50.5     |

<sup>a</sup>pI and Grand average of hydropathicity index (GRAVY) were calculated by using the ProtParam tool (<http://ca.expasy.org/tools/protparam.html>). Asterisks (\*) represents the identified peptides in MS detection.

**Table S3. Identified  $\beta$ -casein peptides in MS detection**

| Peaks                 | Calculated m/z | Sequence                           | Position | pI <sup>a</sup> | GRAVY <sup>a</sup> | MALDI-MS | SALDI-MS |
|-----------------------|----------------|------------------------------------|----------|-----------------|--------------------|----------|----------|
| BT1                   | 830.452        | AVPYPQR                            | 192-198  | 8.79            | -0.929             | *        |          |
| BT2                   | 1138.640       | VKEAMAPKHK                         | 113-122  | 9.70            | -1.030             | *        |          |
| BT3                   | 1383.799       | LLYQEPVLPVVR                       | 206-217  | 6.00            | 0.283              | *        | *        |
| BT4                   | 2061.828       | FQpSEEQQQTEDELQDK <sup>b</sup>     | 48-63    | 3.77            | -2.331             | *        |          |
| BT5                   | 2107.231       | LLYQEPVLPVVRGPFPIIV                | 206-224  | 6.00            | 0.832              | *        | *        |
| BT6                   | 2556.093       | FQpSEEQQQTEDELQDKIHPF <sup>b</sup> | 48-67    | 4.08            | -1.740             | *        |          |
| Matched Peptides      |                |                                    |          |                 |                    | 6        | 2        |
| Sequence Coverage (%) |                |                                    |          |                 |                    | 25.0     | 8.5      |

<sup>a</sup> see Table S2. <sup>b</sup> phosphorylation at serine position. Asterisks (\*) represents the identified peptides in MS detection.

| <b>Table S4. Identified <math>\alpha</math>-casein peptides in MS detection</b> |                |                                             |          |                 |                    |          |          |
|---------------------------------------------------------------------------------|----------------|---------------------------------------------|----------|-----------------|--------------------|----------|----------|
| Peaks                                                                           | Calculated m/z | Sequence                                    | Position | pI <sup>a</sup> | GRAVY <sup>a</sup> | MALDI-MS | SALDI-MS |
| AT1                                                                             | 824.430        | YPELFR                                      | 161-166  | 6.00            | -0.717             | *        | *        |
| AT2                                                                             | 971.498        | FYPELFR                                     | 160-166  | 6.00            | -0.214             | *        | *        |
| AT3                                                                             | 1267.704       | YLGYLEQLLR                                  | 106-115  | 6.00            | 0.070              | *        | *        |
| AT4                                                                             | 1337.681       | HIQKEDVPSEK                                 | 95-105   | 5.45            | -1.755             | *        |          |
| AT5                                                                             | 1759.945       | HQGLPQEVLNENLLR                             | 23-37    | 5.40            | -0.753             | *        | *        |
| AT6                                                                             | 1951.952       | YKVPQLEIVPN <sub>p</sub> SAEER <sup>b</sup> | 119-134  | 4.79            | -0.794             | *        | *        |
| Matched Peptides                                                                |                |                                             |          |                 |                    | 6        | 5        |
| Sequence Coverage (%)                                                           |                |                                             |          |                 |                    | 27.6     | 22.4     |

<sup>a</sup> see Table S2. <sup>b</sup> Phosphorylation at serine position. Asterisks (\*) represents the identified peptides in MS detection.

**Table S5. Detected peptides of 40 pmol BSA digests in the presence of 800 mM urea**

|                       | Calculated m/z | Sequence         | Position | Modification               | pI <sup>a</sup> | GRAVY <sup>a</sup> | MALD-MS | SALDI-MS |
|-----------------------|----------------|------------------|----------|----------------------------|-----------------|--------------------|---------|----------|
| 1                     | 789.472        | LVTDLTK          | 257-263  |                            | 5.84            | 0.429              |         | *        |
| 2                     | 853.424        | CASIQKF          | 223-229  | CYS_CAM (233) <sup>b</sup> | 8.22            | 0.486              |         | *        |
| 3                     | 1017.584       | GFQNALIVR        | 425-433  |                            | 9.75            | 0.578              | *       | *        |
| 4                     | 1075.521       | YANKYNGVF        | 180-188  |                            | 8.50            | -0.567             | *       | *        |
| 5                     | 1170.525       | SQYLQQCPF        | 52-60    | CYS_CAM (58)               | 5.24            | -0.567             | *       | *        |
| 6                     | 1180.547       | GFQNALIVRY       | 425-434  |                            | 8.75            | 0.390              | *       | *        |
| 7                     | 1226.703       | ISLLLLFSSAY      | 7-17     |                            | 5.52            | 1.873              |         | *        |
| 8                     | 1351.685       | LSHKDDSPDLPK     | 127-138  |                            | 5.30            | -1.558             |         | *        |
| 9                     | 1439.812       | RHPEYAVSVLLR     | 360-371  |                            | 8.75            | -0.133             |         | *        |
| 10                    | 1479.795       | LGEYGFQNALIVR    | 421-433  |                            | 6.00            | 0.292              |         | *        |
| 11                    | 1639.938       | KVPQVSTPTLVEVSR  | 437-451  |                            | 8.75            | -0.067             |         | *        |
| 12                    | 1673.77        | QEPERNECFLSHK    | 118-130  | CYS_CAM (125)              | 5.50            | -1.723             |         | *        |
| 13                    | 1880.921       | RPCFSALTPDETYVPK | 508-523  | CYS_CAM (510)              | 6.06            | -0.537             |         | *        |
| Matched Peptides      |                |                  |          |                            |                 |                    | 4       | 13       |
| Sequence Coverage (%) |                |                  |          |                            |                 |                    | 4.6     | 16.8     |

<sup>a</sup> see Table S2. <sup>b</sup> Cysteine was treated with iodoacetamide to form carbamidomethyl-cysteine (CYS\_CAM). The modified position is shown in parentheses. Asterisks (\*) represents the identified peptides in MS detection.
